# Supplementary material for: Natural variation in the binding pocket of a parasitic flatworm TRPM channel resolves the basis for praziquantel sensitivity
Source: PubMed Central journal article supplement — Proc Natl Acad Sci U S A. 2022 Dec 27;120(1):e2217732120. doi: 10.1073/pnas.2217732120 (PMC9910428; doi:10.1073/pnas.2217732120), 2022-12-27
Supplement: pnas.2217732120.sapp.pdf [file pnas.2217732120.sapp.pdf]

## Supplementary Information.

**Supplementary Figure 1.** Amino acid sequence of ten TRPM<sub>PZQ</sub> orthologs that were functionally profiled in this study. Binding pocket residues are highlighted in yellow (trematode consensus) with amino acid variation from the trematode consensus color coded as per Table 1.

**Supplementary Figure 2.** Metadynamics simulations of (*R*)-PZQ complexed with *Sm*.TRPM[D1677E]<sub>PZQ</sub>. *Left*, representative free energy plot resulting from metadynamics simulations of (*R*)-PZQ complexed with *Sm*.TRPM[D1677E]<sub>PZQ</sub>. The x-axis is the collective variable (CV), set as the distance between the center of mass of (*R*)-PZQ and the center of mass of D1677 (in Å). The y-axis shows the free energy of that interaction (in kcal/mol). The red box encloses the relative minima of the simulation. *Right*, the associated binding pose of (*R*)-PZQ within *Sm*.TRPM[D1677E]<sub>PZQ</sub> from the boxed frame on the left.

**Supplementary Figure 3. A Comparison of the Binding Pose of (*R*)-PZQ in *Sm*.TRPM<sub>PZQ</sub> to the binding pose of icilin and Cryosim-3 in *Hs*.TRPM8. (A&B)** The overlay of ribbon structures of *Sm*.TRPM<sub>PZQ</sub> and *Hs*.TRPM8 (PDB: 6NR3, panel A) and the overlay of ribbon structures of *Sm*.TRPM<sub>PZQ</sub> and the agonist bound, open state of *Hs*.TRPM8 (PDB: 8E4L, panel B) are shown. Both show good alignment of the secondary structure of the VSLD. **(C&D)** The binding pose of (*R*)-PZQ (pink) in the VSLD of *Sm*.TRPM<sub>PZQ</sub> superimposed on the binding poses of **(C)** icilin (green, from PDB 6NR3) in *Hs*.TRPM8 and **(D)** Cryosim-3 (green, from PDB 8E4L) in *Hs*.TRPM8 is depicted. D1677 (*Sm*.TRPM<sub>PZQ</sub>) is anchored outside the binding pocket (pink) whereas E1003 (*Hs*.TRPM8) projects into the binding pocket (green). **(E&F)** The binding pose of (*R*)-PZQ (pink) in the VSLD of *Sm*.TRPM[D1677E]<sub>PZQ</sub> (from metadynamics, Figure 6) superimposed on the binding pose of **(E)** icilin (green, from PDB 6NR3) in *Hs*.TRPM8 and **(F)** Cryosim-3 (green, from PDB 8E4L) in *Hs*.TRPM8 is depicted. Residues E1677 (*Sm*.TRPM[D1677E]<sub>PZQ</sub>, pink) and E1003 (*Hs*.TRPM8, green) both project into the binding pocket. Notably, (*R*)-PZQ, icilin, and Cryosim-3 all present in similar 'vertical' binding poses in the presence of the TRP domain glutamic acid.

**Supplementary Table 1.** Amino acid identity between functionally profiled TRPM<sub>PZQ</sub> orthologs. Sequences were aligned and analyzed as detailed in the Methods. Species are abbreviated as: *Sm* (*Schistosoma mansoni*), *Sh* (*Schistosoma haematobium*), *Sj* (*Schistosoma japonicum*), *Cs* (*Clonorchis sinensis*), *Ov* (*Opisthorchis viverrini*), *Ec* (*Echinostoma caproni*), *Fh* (*Fasciola hepatica*), *Fg* (*Fasciola gigantica*), *Ml* (*Macrostomum lignano*), *Eg* (*Echinococcus granulosus*), *Mc* (*Mesocestoides corti*). Identity is color-mapped >80% (green), >60% (yellow), >40% (blue) and >20% (red).

**Supplementary Table 2. TRPM<sub>PZQ</sub> binding pocket comparison.** This table lists the identities of twenty-three residues predicted to comprise the PZQ binding pocket in TRPM<sub>PZQ</sub> orthologs across 46 different flatworm species as well as human TRPM2 and TRPM8. These species comprise 43 parasitic flatworms and 3 free-living flatworm (*Rhabditophora*) representatives. The identity of the 23 residues lining the binding pocket in *Schistosoma mansoni* TRPM<sub>PZQ</sub> (*Sm*.TRPM<sub>PZQ</sub>) are used as reference for comparison (top row of table). Grey bars represent missing sequence information from published genomes. The consensus sequence is well conserved, with just three loci of variation across all examined parasitic flatworm sequences (highlighted by shading). These loci are (i) in the S1 helix (green, N1388 in *Sm*.TRPM<sub>PZQ</sub>), (ii) in the cytoplasmic loop between S4 and S5 (pink, T1518 in *Sm*.TRPM<sub>PZQ</sub>) and (iii) at the distal end of the TRP helix (orange, D1677 in *Sm*.TRPM<sub>PZQ</sub>). Further positions of variation present in free-living platyhelminths and human TRPM channels are shown in black. For each species, the related BioProject IDs and gene identifiers are as follows. Orthologs that are functionally profiled

in this study are bolded. Gene Identifiers (Wormbase, BioProject ID) and Genbank (GB) accession numbers for available sequences are as follows: *Schistosoma mansoni* (PRJEA36577, Smp\_246790.5); *Schistosoma haematobium* (PRJNA78265, MS3\_0012599.1 partial); *Schistosoma japonicum* (PRJEA34885/PRJNA520774, EWB00\_008853); *Schistosoma bovis* (PRJNA451066, DC041\_0009326 partial); *Schistosoma curassoni* (PRJEB519, various); *Schistosoma margrebowiei* (PRJEB522, SMRZ\_0001736801 partial); *Schistosoma mattheei* (PRJEB523, various); *Schistosoma rodhaini* (PRJEB526, SROB\_0000612701 partial); *Trichobilharzia regent* (PRJEB4662, various); *Clonorchis sinensis* (PRJDA72781/PRJNA386618, csin109609); *Opisthorchis felinus* (PRJNA413383, CRM22\_004304 partial); *Opisthorchis viverrini* (PRJNA222628, T265\_03361); *Paragonimus westermani* (PRJNA454344, DEA37\_0005686 partial); *Paragonimus heterotremus* (PRJNA284523, KAF5404912.1; KAF5404913.1 (GB)); *Paragonimus kellicotti* (PRJNA179523, KAF6777619.1 partial (GB)); *Paragonimus miyazakii* (PRJNA245325, KAF7262430.1 (GB)); *Dicrocoelium dendriticum* (PRJEB3954, various); *Atriophallophorus winterbourne* (PRJNA636673, maker-jcf7180000220132-snap-gene-0.1; maker-agouti\_scaf\_1481-snap-gene-0.0); *Echinostoma caproni* (PRJEB1207, ECPE\_0000226901); *Fasciola gigantica* (PRJNA230515, FGIG\_00826); *Fasciola hepatica* (PRJEB25283/PRJNA179522, THD26109.1 (GB)); *Fasciolopsis buski* (PRJNA284521, KAA0184185.1 (GB)); *Gyrodactylus salaris* (PRJNA244375, maker-scf7180006953457-snap-gene-0.79-mRNA-1 partial); *Gyrodactylus bullatarudis* (PRJNA532341, various); *Protopolystoma xenopodis* (PRJEB1201, PXEA\_0002869701-mRNA-1 partial); *Echinococcus canadensis* (PRJEB8992, EcG7\_04348; EcG7\_07443); *Echinococcus granulosus* (PRJEB121/PRJNA182977, EgrG\_000986600); *Echinococcus multilocularis* (PRJEB122, EmuJ\_000986600); *Echinococcus oligarthrus* (PRJEB31222, various); *Hydatigera taeniaeformis* (PRJEB534, various); *Taenia asiatica* (PRJEB532/PRJNA299871, TASs00007g01845); *Taenia multiceps* (PRJNA307624, Tm1G005541); *Taenia saginata* (PRJNA71493, TSAs00047g06173); *Taenia solium* (PRJNA170813, TsM\_000444100 partial); *Hymenolepis diminuta* (PRJEB30942/PRJEB507, various); *Hymenolepis microstoma* (PRJEB124, HmN\_000757100.2); *Rodentolepsis nana* (PRJEB508, various); *Mesocestoides corti* (PRJEB510, MCU\_009642-RA partial); *Moniezia expansa* (PRJNA668441, JADFDV010000093.1); *Schistocephalus solidus* (PRJEB527, SSLN\_0001491701 partial); *Spirometra erinaceieuropaei* (PRJEB1202, VZI00796.1 partial (GB)); *Dibothriocephalus latus* (PRJEB1206, various); *Sparganum proliferum* (PRJEB35374, VZI30146.1 (GB)).

## Supplementary Figure 1.

>Sh. TRPM<sub>p2Q</sub> (2195)

MTEQIPFQRTSTIKHRISRTGSIGQDHNNNNNNNNNTTGNMMITSGINNSGIQHQQSSIRRPSIMQKY  
MGEIEFTGLNQTARFCKLNSDTPDSVLRDILKRKWGLKPPTLIITVFGTDFEKKRKLKMIFKKGLWKAEE  
SGCWIVTGGFHLGVMKLTGEAVRDYTDAYGGRMMAFGVASWDCVTKNEILEAALHEGTAVYQSEDEEE  
EAEDSEPIILIDPLSQSGLKSVRSIEERALDPNHNFFVLVDDGTTDQLKGKEAELRARFERCISLWNCAS  
SPQEQTTTATSPQSGPISSTTHLQQQQQQQPQNGISTPSNINNNVNSVGLQRQGSTMGGQVSTTSGPQT  
SATSIGKNSGITGGSTNSALSKGASEPIVSNQPISTVSVTRGAKDKLTTESSLKPAKSGKSVGSEEEIL  
VPMCGLVVGGDRFTLRQVYCSMIRNRCPIVVTKGTSGAADVLAFLDAANKMASEEVVDDKDQVPLEARL  
ESIIEEFLGDLHPDYTYTDEVNMLCEIINDYTNLVSVFDMEEDSDLDGYVISSLLASAGTTVTSDQINL  
EQLEITLTLNRADIAREKIFLENKKWKKGQLNDYMYQALMSDRHDFVKLFLEQGFSLDFLTIIYMLEKLY  
TDQLKNLNSKVAIFNKMWEYNRSHRTSKVALRDVGKVIKALVGDYFHPYLYLSKEFQAKLMPEKRLEGAGT  
RAIIRRGATSVPEAKNHDDGDDNDDYNDGDDREYNGDELYGNNIDGYTINSRLPRSSTTMTTVSGEP  
LIASTILRSNEKGNTMGTSTITLIGGSRLREGNIPHQYHSIDQMNSSRSHSRNPMITIYDKQQINDITED  
INNQSKKSKYLSATRNDGNRNGHSSRNKHGRSSSQTNEHDMLIPGQPLIYNATVTNVSRSRSGHSGRGPY  
TSLGPGHFRIAGKAPLAYDTTSMGTTPIQSPKPAINDTLQFSFDNEHVQRNSVLISPIQNEKSIKPVLF  
EDEANNKSSRSCFMSCIQKISSFC SRLFRCNTDSKKSNGKLNVSQEPSGIKGPKEFATLRAMAALAAATA  
ATAVADPTKTS PGDLLIPSNFFEPDEEQTKSIQLDRPARELLIWSILAGKLRMAELFWTMEKEPIAAALL  
ASILLTSLGNKTD DFTDKEDYRSFAKNFQERAEGVLNECYREDEHRTQLIINHELIYYGRSSVIKLAAG  
QSIKMAHAPCCQDFLTNTWSGNLSTKNSVFRYIMGVVCGLTLPFLIPKVILSKPKAIPTEGEESSPTSE  
QQGSTQNNHTLKYVLTAE DAGKKGVRKTLQARTLEYISQIRDFYMAPVVRVYNTISYITFLILFSYLLL  
VDFRINITVVEYVVIWVITLFIIEIKQIAWAVLSGISFRTYISDGWNKLD CAGLALYIVGFILRLIVLL  
RLRSHEGENFNIQYERYIYVTDPI LDPSRICLAISLFTFYIRLMYTFSFHIALGPKLIMIGKMVTNDLIP  
FMIILTVMVGYAVAAQSIAYPNGLFTKENMTLNSEIKHMTFADIIFSMYTTAYFQMF GDFSLDALQGED  
RTCQNHMCPTKTSRWLVPIMLGFYVLLTNILMFNLLIAMFSKTYEEIESASTYYWNYQRYQMINDYVHR  
PLAPPIIIVWHFYEAAYKAIGNQCASLRNAETAKYNPFCVRFTDVKKEREMVKWEHMKAMDYLREPSTKAT  
GKRGVAESRAVVFRGGGGVGPQGPVMDLKSEMSSVTEGIGMELEKRFKEIDNQFQRFNDVDSRLNDVTQ  
LLTNLSEVISNVTETQQRIRIQINELPTCQCNEFTDEVVPVQKSTTTQADSGTAETRKRKLEVAIQSAL  
EAAKDVLRPPTPPPPPPPPPPRESVLLAAVVPGEEDSSGSEEGDPSADPVI VQVPDIKTGRVIE  
RTLGDHRLWRMAPFNFEKYPGMRMNVP PERMAWTV EYPDYFAYDACEEVLLFPSEESHGDNFTHGNIVF  
TFQHSENLR TINFNQYDSKAKLRRQSLLGRYRLDSTTGAPLNPMGRTGLLGKGLLPRWGPNH SFVLCITR  
WTRDTRTG VQVIRSNRGLVQYLALERNKRLCMPWYLT DHTNKCDFDECVPKISSLVTRRGRAILPEKRV  
ERLLKRIEKA EVTQIFKGYLDDQLNADSAWMETVVINLHESESKGAQLPDDILKLLNEPGTEEQCKWVEV  
SHSSNLRTSHNYILKNIAELRRAFY

>Sj. TRPM<sub>p20</sub> (2179)

MTEQIPFHRTSTLKHRSRTSSVIVQDNTIGGVATNTNTAATTTTGSIVVPAGGGGSGLQQQSSVRRPSV  
MQKYMGEIEFTGLNQATARFCKLNSDTADSVLRDILKRKWGLKPPTLIITVFGTDFEKKRKLKMIFFKGLW  
KAAESGCWIVTGGFHLGIMKLTGEAVRDYTDAYGGNRMMAFGVASWDCVTKNEILEALHEGTAVYQSEE  
DDEEEAEDSEPILVDPLSQAGLKSVRSDVEERALDPNHNFFVLVDDGTTDQLKGKEAELRARFERCISLW  
NCASSPQEQNITGTNQQSGAITSTTHLQQPQGVISTSSNINNNVTPGGGLQRQGSTMGQTSTTSGPQTS  
TSIGKSGTGGSSNSALSQVSEPVVSNQPI SATSTTRGAKEKPTDSSIKQKSGKSVGSEEEILVPM  
CGLVVGDRFTLRQVYCSMIRNRCPIVVTKGTSGAADVIAFGLDAANKMASEEVVDDKDQVPLEARIESI  
IEEFLSDLHPDYTNYTDEVNMLCEIINDYTNLVSFVDMEDSDLDGYVISSLLASAGSTIASDQINLEQL  
EITLTLNRADIAREKIFLENKKWKKGQLNDYMYQALMSDRHDFVKLFLEQGFSLDFLTVMLEKLYTDQ  
LKNLNSKVAIFNKMWEYNRSHRTSKVALRDVGVKVIKALVGDFYHPLYLSKEFQTKLMPEKRLEGAGTRAI  
IRRGATSVPEPNEENRDLPIDDDGNAIYGDNNDEFIVNYRLPRSSATAITTSIGEPLLTSTALHNSEKGGT  
AMGTTVPAVKIGTGRKGGNVQHYYPNERAKSSRSRNPFTTTTYDKQLTNDINDKLDSPRSTYLSATR  
NNNFNRNGHSGRNRYGHHSSSHSNEHMLIPGQPLIYNATVTSVNRSGRGRSVNYTSLGPGHFRIAGR  
LAYDAASVGTTSVPVQSPKPGMNDTLRFSDDDRQPNVLISSNLNEKPIKPVLFEDEMINKPSRSC  
CFQKISSFCGRFLFRNTGSKKSKKASNL SHEVSGIKGPKFATLRAMAALAAATAAVADPTKGTQGD  
IIPPNFDPDEEQTKSIQLDRPARELLIWSILVGLRMAELFWTMEKEPIAAALLASILLTSLGKNTDDF  
TDKEDYRSFAKNFQERAEGVLNECYREDEHRTQLIINHELIIYGRSSVIKLAEEGQSIKFM  
AHPCCQDFLTNTWSGNLSTKNSVFRYIMGVVCGLTLPFLIPKVLILSKPKTGPTTEGEESASSE  
QQPSTQNDHTLKYLTSAEDAGKNGVRKTLQARTLEYISQIRDFYMAPVVRVYNTISYITFLILFSY  
LLLVDFRINITVVEYIVI AWVVTLFIEEIKQIAWAVLSGISFRTYISDGWNKLD CAGLALYIVGFILRLI  
VLLRLGGEKNFDFQHERY YIVTDPILDPSRICLAISLFTFYIRLMYTF SFHIALGPKLIMIGKMV  
TNDLIPFMIILTVIMVGYAVAAQ SIAYPNGLFTKENMTLNSEIKHMTFADIIFSMTTAYFQMF  
GDFSLDALQGEDRTCQNHMCPTKTSRWLV PIMLGFYVLLTNILMFNLLIAMFSKTYEEIESAS  
TYWNYQRYQMINDYVHR SPLAPPIIIVWHFYEAYK AIGNQCASLRNAETAKYNPFCVRFTDL  
KKEREMVKWEHMKAMDYLREPSTKATGKRGVAESRAVVFRGGG GVGPGQGPVMDLKSEMS  
SVTEGIGMELEKRFKEIDNQFQRFNDVDSRLNDVTQLLNLSEVISNVTDTQQ RIIRQINEL  
PTCQCNELTDEIVPVQKSPTTLQADKGTMETRKRKLEVAIQSALEAAKDVLRPPTPPPP  
PPPPPPRESPVLLAAVVPGSEDDSSGSEEGDPSADPTLVPQVPDSKTGRVIERVLGDHRL  
WRMAPFNF EKYPGMRMNVP PERMAWTVEYPDYFAYDACEEVLLFPSEESHGDNFTHGNI  
IFTFQHSENLRTINFNQY DSKARLRRQSLGRYRLDSTTGAPLNP MGRTGLLGKLLPRWGP  
NHSFVLCITRWTRDTRTGAQIIRSNR GVLQYLALERNKRLCMPWYLT DHTNKCDFDECI  
PKLISNLITRRGRAMLPEKRVERLLKRIEKA EVTQIF KGYLDDQLNADSSWMETVVINL  
HESESKGAQFPNDILKLLNEPGTEEQVKWIEVSHSSNLRTSHNYILKN VAELRRAFY

>Cs. TRPM<sub>p20</sub> (2172)

MQEQPALQRASTVRRSAYRASMMSPGDSGGIGALAASVGLQQSSVRRTSVMQRYVGEIEFTGMNQTAKF  
CKLDSSTNDMVIRDLLKRKRWGLKPPTLIITVFGTDFEKKRKLKMIFFKGLWKAAESGCWIVTGGFHLGIM  
KLTGEAVRDYTDAYGGNRMMAFGVASWDCVMKNELLEAALHEGTAVYQSEEDDEEQEESVIALNEPTHDG  
EKKTVRTDIEERALDPNHNYFVLVDSGVSDQAKGKEAECRARFERCISQWSGAKIALDQSGAGGAGAVTT  
QSGGITSSTHLQVTQGSSTQGSNVTNQSNVTLQREGSASGPAGLQSSSTSVNKGSKTTGGSSTTSGIQKPG  
TEQIASGQVASGAKQAGEKSLLDLSGKLQKTGKSVGGEEDILVPMCGLVVGDRFTVRQVYCSVIQNRCF  
IVVTKGTSGAADVIAFGLDAASKMATEEAVDDKEFPVPLETRIESIEEFGLGDMHPDYTSYTEEVNMLCEI  
INDYSNLVTVFDMEEEDSLDGYVISSLLASAGSIVASDQINLEQLEITLTLNRADIAREKIFLENKKWRK  
GQLNDYMYQALMSDRHDFVKLFLEQGSLEEFLLTVYMLEKLYTDQLKNMNSKVAIFNKMWEYNRSHRSSK  
VALRDVGKVIKALVGDFFYHPLYLSKEFHAKLMPEKRLEEPGRGKPYDPDAPFISDEDSFSYSYDSSYDNGA  
ISPRTLGLRERVRFIDHGEEHERDWLAGVHPPGAGFQNPAPFLEQDKTVRVTSTRGATSGEPGRPDGDDSD  
GKGGTANGTSEKLDPEERYDQOGIPRSSTTVTTVSGDILLPAKSPKRSVDQORDQSQRRTSREHRRGRSPP  
PYEGTTLRQNAAYARPVRNGSQKRGQQNDPRYTRRRPSLDNMHDIPIPGQPLVYNAIVPAVNRSAAGYGGT  
AYTSLGPGHFRITGRAPLAYDASVESSGIAIPLNRAADENIYVSRDNIHEQPIRPFAPPAHSDVSSFTIG  
IRSAGTFEQGLRGCWRWVTSCCVRILGRSSTKNQGETAIEHQDGMKGREFTTLRAMAALAAATAVTAVA  
DPSKAPHTDEEQTKAIQLDRPARELLIWSILVGKLRMAELFWTMEKEPIAAALLASILLTSLGNKTDDFT  
DKEDYRSFAKNFQERAEGVLNECYREDEHRTQLIINHELMYYGRSSVIKLAEEGQSIFMAHPCCQDFLT  
NTWNGNLSTKNSVIRYFLGIIICGLTIPFLIPKIIILAKPKTNPVTEEEETSTTVESANVNHDDAGSLVKEN  
AMVRRKSIRKFRHNTKEFIAQIRDFYMAPVIRFVYNTISYMAFLILFSYLLLVDFKIQISVVEYIVIAW  
VVTLLEIEIKQIAWAVLSGISFRTYISDGWKNKLDCTGLGLFIVGFVLRMIVLLRIGHGQHLDPHERFYI  
VTDLYLDSLRI SLAISL FV FYIRL MYTFSFNIALGPKLIMIGKMTNDLIPFMIILTVMVGYAVAAQSI  
AYPNGLFTKENMTLGCDVKQMNFTDIIFAMYTTSYFQMFGDFSLDALQGEDRTCQNNMCPTKTSRWLVPI  
MLGFYVLLTNILMFNLLIAMFSKTYEEIESASTYYWNYQRYQMINDYVHRSPLVPIIFWHFYEAYKAI  
GNRCASLRNHENTKHNPFVFRFTDLKKEREMVKWEHMKAMDYLREPSQKGSKRGAAESRAVVFRGGGGG  
PMQGPVMDLKSEMSSVTEGIGMELEKRFKEIDSQFQRFNDVDSRLGEVTQMLTNLSDVRSVTETQQRIM  
KQISELPTCQCNELTDEVIPIPSVEPGAPSTESRKRKLEIAVQSALEAAKDVLRPPTPPPPPPPPPPPP  
RESPVLLAAPIPGSEDEDSSGSEEGDPSADPVKSPDVS DNRTGRVIERNVAEHLRWRIAPFNFEKYPGMR  
MNVPPERMAWTTEYPDYFAYDACEEVLLYPSEDAHDGENFTHGNADFAFKLSENLRGINFNQYDPHAKIR  
RQSLGGRYRLDPTTGAPLNPMGRTGLLGKGLLPRWGNHSIVICITRWSRDPRTGNQVTRSNRGVLQYIA  
LERTKRLCIPWYLT DHSNRCELDTCVPKVISSFITRRARATLSEKRVDRLLKRLDKAEVTQIFKGYLDDQ  
LNADSAWTETVVINIHEGNAKGAYMGDDFLKLFGEPATGEQCKWMEVVGQSSNLRTSHNYILKSVAESKRA  
FY

>Ov. TRPM<sub>p20</sub> (2173)

MQDQPALQRASTVRRSAYRASMMSPGDSGGIGALAASVGLQQSSVRRTSVMQRYVGEIEFTGMNQTAKF  
CKLDSSTNDTVIRDLLKRKWGLKPPTLIITVFGTDFEKKRKLKMIFFKGLWKAAESGCWIVTGGFHLGIM  
KLTGEAVRDYTDAYGGNRMMAFGVASWDCVMKNELLEAALHEGTAVYQSEEDDEEQEDSVIALNEPHTDG  
EKKTVRTDIEERALDPNHNYFVLVDSGVSDQAKGKEAECRARFERCISQWSGAKIALDQSGAGGAGAATT  
QSGGITSSTHLQATQSSSQTGSNVTNQSNVTLQREGSASGPAGQQSSTSVNKGSKATGGSSTTSGTQKPG  
NEQTAPGQAASGAKQAGEKSLLDLSGKLQKTGKSVGGEEDILVPMCGLVVGDRFTVRQVYCSVIQNRCF  
IVVTKGTSGAADVIAFGLDAASKMATEEVVDDKEFPVPLETRIESIEEFGLGDMHPDYTSYTEEVNMLCEI  
INDYSNLVTVDFMEEDSDDLGYVISSLLASAGSIVASDQINLEQLEITLTLNRADIAREKIFLENKKWRK  
GQLNDYMYQALMSDRHDFVKLFLEQGSLEEFLLTVYMLEKLYTDQLKNMNSKVAIFNKMWEYNRSHRQSS  
KVALRDVGKVIKALVGDFYHPLYLSKEFHAKLMPEKRLEEPGPGKPYDPDAPFISDEDSFSYSDNSYDNG  
AISPRTLGLRERVRFIDHGEHERDWLAGVHPPGAGFQNPAPLEQDRITIRVTARRGATSGEPGRPDGDDS  
DGKGAANGTSEKLDLEEKYNQOGIPRSSTTVTTVSGDILLPAKSPKRSADQDQSQRRTSREHRRGRSP  
PPYEGTTLRQNAVYARPSRNGSQKRGQQNDPRYTRRRPSLDNMHDIPPIPGQLVYNAIVPAVNRSAAGYGG  
TAYTSFGPGHFRTITGRAPLAYDASVESSGIAIPLNRAADENVYVSRDNINEQPIRPFAPPAHSDVSSFTI  
GIRSAGAFEQGGRLRCWRVWTSCCVRILGRSSSKDRGETGMEHQDGMKGREFTTLRAMAALAAATAVTAV  
ADPSKAPHTDEEQTKAIQLDRPARELLIWSILVGKLRMAELFWTMEKEPIAAALLASILLTSLGNKTDFF  
TDKEDYRSFAKNFQERAEGVLNECYREDEHRTQLIINHELMYYGRSSVIKLAEEGQSIFKMAHPCCQDFL  
TNTWNGNLSTKNSVIRYFLGIICGLTIPFLIPKII LAKPKTNPVTEEEETSTTVESANVNQEDAGSLVKE  
NAMVRRKSIRKSFRHNTKEFIAQIRDFYMAPVIRFVYNTISYMAFLILFSYLLLVDFKIQISVVEYIVIA  
WVVTLLIEEIKQIAWAVLSGISFRTYISDGWNKLDCTGLGLFIIGFVLRMIVLLRIGHRQHLDPHERFY  
IVTDLYLDLSRISLAISLFFVYIRLMYTFSFNIALGPKLIMIGKMTNDLIPFMIILTVIMVGYAVAAQS  
IAYPNGLFTKENMTLGC DVKQMNFSDIIFAMYTTAYFQMFGDFSLDALQGEDRTCQNNMCPTKTSRWLVP  
IMLGFYVLLTNILMFNLLIAMFSKTYEEIESASTYWNQRYQMINDYVHRSPVPIIFWHFYEAYKA  
IGNRCASLRNHENTKHNPFCVRFTDLKKEREMVKWEHMKAMDYLREPSQKGSKRGAAESRAVVFRGGGG  
GPMQGPVMDLKSEMSSVTEGIGMELEKRFKEIDSQFQRFNDVDSRLGEVTQMLTNLSDVRSVTETQQRI  
MKQISELPTCQCNELTDEVIPIPSVEPGAPSTESRKRKLEIAVQSALEAAKDVLRPPTPPPPPPPPPP  
PRESVLLAAPVPGSDEDSSGSEEGDPSADPVKSPDVSDNRTGRVIERNVAEHLRWRIAPFNFEKYPGM  
RMNVPPERMAWTAEPDYFAYDACEEVLLYPSEDAHDGENFTHGNIDFAFKLSENLRGISFNQYDPHAKI  
RRQSLGRLDPTTGAPLNPMGRGTLLGKGLLPRWGPNSIVICITRWSRDPRTGNQVTRSNRGLVQYI  
ALERTKRLCIPWYLT DHSNRCELDTCVPKVISSFITRRARATLSEKRVDRLLKRLDKAEVTQIFKGYLDD  
QLNADSAWTETVVINIHEGNAKGAYMGDDFLKLFSEPATGEQCKWMEVGQSSNLRTSHNYILKSVAESKR  
AFY

>Ec. TRPM<sub>p20</sub> (2260)

MTEQIPFHRTSTVRRTVNRTGSGVPGDSVGVSAALASTALQHQASVRRTSVMQRFVGEIEFTGLNQTAKF  
CKLDGSTTDQVIRDLLKRWGLKPPTLIITVFGTDFEKKRKLKMIFFKGLWKAAESGCWIVTGGFHLGVM  
KLTGEAVRDYTDAYGGNRMMAFGVASWDCVTKNEILEAALHEGTAVYQSEEDDEEEQDESDRGVAGPGGAT  
GNKTVRS DVEERALDPNHNFFILVDSGVSDQAKGKEAELRARFERCISQWSCATPALDQSMGGTGGAGGT  
APTSAGITSSTQLQQQTQSGSNLNNQSSTLLQREGSTRVSVAPQPGSGVNLSSSSVSGKTQVAPGTVSSTA  
LATQRTAAEQISASQGTGMRTAGEKSLPDVSKPQKSGKSVGSEEEVLVPMCGLVVGGDRFTLRQVYCSMI  
QNRCP I VVTKGTSGAADVIAFGLDAANKMATEEAVDDKEPVPLENRIESIIEEFLSDMHPDCSNYTEEVN  
MLSEIINDYSNLVS VFDMEEDSDLDGYVISSLLASAGSTVASDQINLEQLEITLTLNRADIAREKIFLEN  
KKWKKGQLNDYMYHALMSDRHDFVKLFLEQGFSL EEF LTVYMLEKLYTDQLKLNLSKVAIFNKMWEYNRS  
HRQSSKVALRDVGVKVIKALVGDFYHPLYLSKEFQAKLMPDKQLEGAVRDKLLGSRRSRPSHDSGSQSDST  
YSNAGAI SPRTLGLKERVRFIDHGDEGSVDGFSDFPGPDSGFQNP AFLELDQOQQOHLHYRYQQEEHEEE  
DVEKEESKAEDVIHKWCMFYSYGQTARNAIRRGATSGEAGPSDLDEADKSRPETNGKAQRGVKGGPLRQDS  
KDSDEFYPSRGLPRSSTTVTTVSGEVLLPASSPSKGAATHEAGFSRGRASRDRTQGGAPPPYDNNGAASA  
SSYVRSNVHVTGVRAASQNRVNNASTRLRYTRRRPSLENMYDIP I PGQPLVYNATVANVMRVGHESRGT  
YTSLGP GHVRMTGRAPLAHDPVTSAEASSVRVSLGQVRNEHFRGSPDNVAEHQIATYTPRHCSSETSHSTL  
ALDFTGKPSRCL SACWHWLTSTCSHIFRRNRKDGDKLRNVMQQMHQHQQOQQGQGGQPGIKGPREFAT  
LRAMAALAAATAATAVADPTKAAHGDEEQTKAIQLDRPARELLIWSILVGKLRMAELFWTMEKEPIAGAL  
LASILLTSLGNKTD DFTDKEDYRSFAKNFQERAEGVLNECYREDEHRTQLI INHELTY YGRSSVIKLAEE  
GQSIKFMAHPCQDFLTNTWSGNLSTKNSVFRYFLGICGLTMPFLI PKIILAKPKAQPVGEEEEATGHP  
ETAPATTEEPSTTTLLGGGSIGKQSLRKSFHASTREYFQQIRDFYMAPVIRFVYNTISYVTEFLALFSYLL  
LVDFKIEISVVEYIVIAWVITLFI EIKQIAWAVLSGISFSTYISDGWNKLD CAGLGLFIVGFILRLIVL  
VRTGNDQPLDSVHERYIILTD PFLDVSRTC LAISL FV FYTRLMYTFSFHIALGPKLIMIGKMTNDLIPF  
MIILTVIMVGYAVAAQSIAYPNGLYTKENMTLGTDTKHMGFSDIIFAMYTTSYFQMFGDFSLDTLQGEDR  
MCQNQMCPTKTARWLVPIMLGFYVLLTNILMFNLLIAMFSKTYEEIESASTYYWNYQRYQMINDYVHRSP  
LVFPPIIFWHFYEA YRAIGNRCASLRSHENIKHNPFCVRFTDIKKEREMVKWEHMKAMDYLREPSTKASG  
KRGVAESRAVVFRRGGGAGPGQGPVMDLKSEMSSVTEGIGMELEKRFKEIDSQFQRFNDVDSRLNDVTQML  
SNLSEVRSVTETQQRI IKQISELPTCQCNELSDEVI PAAPGETGTASREVRKRTKLEIAVQSALEAAKD  
VLRPPTPPPPPPPPPPPPRES P VLLAAPIPGSEDDSSGSEEGDPKSDPFTVPDVTDNRTGRVIERVINA  
HRLWRIAPFNFEKYPGMRMNVPPEKMAWTTEYPDYFAYDACEEVLLFPNEEAHDGENFTHGN YDFAFTLS  
EKLRS MNFNQYDPKAKLRRQSL LGRYRLDPTTGAPLNPMGRTGLLGKGLLPRWGPNHSIVVCITRWSRDA  
RTGNQITRSNRSVLQYIALERNKRLCIPWYLT DHSNQCDFDVCVPKLIS SFITRRARANLPERRVDRLLK  
KLDKADVTQIFKGYLDDQLNADS AWTE TVVINIHEGGSKGAYLNDTFLKIFNEPNTGEQARWMEVSQSSN  
LRTSHNYILK SVAENKNAFY

>Fh . TRPM<sub>p20</sub> (2146)

MTEQASIHRTSTVRRTVTRTGSVAPGDSV GASALAA S AALQHQASVRRASLMQRFVGEIEFTGLNQTAKF  
CKLDSSTNDQVIRDLLKRKWLKPPPTLIITVFGTDFEKKRKLKMIFFKGLWKAAESGCWIVTGGFHLGVM  
KLTGEAVRDYTDAYGGNRMMAFGVASWDCVTKNEILEAALHEGTAVYQSEEEDEEERDES DRGVAGIGDDT  
AGDKTNRSDVEERALDPNHNFFILFDSGVSDQAKGKEAELRARFERCISLWSCATAALDQSVGGTAGLGG  
TAPLSAGITSSSQ LQQQTQSGSNVNNQSSAVFQREGSTRISAAPQSGSGGNLSSGSASKTQVAQGTFSST  
GIAAQRTTGEQLSASQGTGVRTS GEKSF PDLNKPQKSGKSVGREEQVLVPMCGLVVGGDRFTLRQVYCSM  
IQNRCPIVVTKGTSGAADVIAFGLDAANKMATEEVVDDKEPVPLENRIESIIDEF LSDMHPDCTNYTEEV  
NMLCEIISEYSNLVS VFDMEEDSDLDGYVISSLLASAGSTVASDQINLEQLEITLTLNRADIAREKIFLE  
NKKWKKGQLNDYMYHALMSDRHDFVKLFLEQGFSL EEF LTVYMLEKLYTDQLKNLNSKVAIFNKMWEYNR  
SHRQSSKVALRDVGKVIKALVGDFYHPLYLSKEFQAKLMPDKQLEGAARNAIRRGATSGAAGPVDLEDE  
DKLRPETNGKANRAKGGAVRQESRDSDEFYPGRGMPRSSTTVTTVSGEVLLPAASPAKRVPVDEQVNSRR  
GKVTQSRTQSRLPPP YDTAAASSTSYVRPNIHVATGRAGSQYRS GTNTTHLRYARRRPSLENMYDIP  
GQPLVYNATVANVIRSGHESRGTHNTGRGHVMTGRAPLAQDSIASADTSSVRVSLGQVRNDHFPGSLE  
RVPDHIATYTPRRGSEASHSTLALDNMGKPSRSCLSACWHWFSSSCGHIFRRSREKEGDKLRNVMQQAQ  
FHQQLQQQQGQGGQPGIKGPREFATLRAMAALAAAATAAVADPTKAAHGDEEQTKAIQLDRPARELLIW  
SILVGKLRMAELFWTMEKEPIAGALLASILLTSLGNKTD DFTDKEDFRSFAKNFQERAEGVLNECYREDE  
HRTQLIINHELTYGRSSVIKLA AEGQSIKFM AHPCQDFLTNTWSGNLSTKNSVIRYFFGIVCGLTIPF  
LIPKII LAKPKAQPVNEEEETGGRAETILHNTDEPSGETLLVGD TTVKQSIIRGLHERAREYFQQIRDYF  
MAPVIRFVY **TTVSYAT** **F**LVLF SYLLL VDFRIEISIVEYVVI A **VVTLFI** **EEIKQIAWAVLSGISFSTYIS**  
**DGWNKLD** CAGLGLFILGFFLR LTVLLRMDKA EPLSPLHERYHVLTDPFLDVSRTCLAISL FV **EYTRLMYT**  
FSFHIALGPKLIMIGKMTNDLIPFMIILTVIMLGYAVAAQSIAYPNGLFTKENMTLGSDIKHMNFGDII  
FNMYTTSYFQMFGDFSLDALQGEDPKCQNHMCPTKTSRWLVPIMLGFYVLLTNIIMFNLLIAMFSKTYEE  
IESASTYYWNYQRYQMIN **DYVHR** S **PLVPII** IFWHFY EAYKAI GDRCASLRNHENIKHNPFCVRF TDVKK  
EREMVKWEHMKAMDYLREPSTKASGKRGVAESRAVVFRGGGAGPGQGPVMDLKSEMS SVTEGIGMELEKR  
FKEIDSQFQRFNDVDSRLTEVTQMLSNLSDVVR SVTETQQRIMKQISELPTCQCNELSDEVI PAPSDEKG  
VSSKEIRKRTKLEIAVQSALEAAKDVL RPPTPPPPPPPPPPPPRES P VLLAAPVPAGSEDDSSGSEEGGD  
PKADPF AVPEVTD SRTGRVIERVINAHRLWRIAPNF EKYPGMRMNPPEKMAWTTEY PDYFAYDACEEV  
LLFPNEDAHDGENFTHGNFDFAFTLSEKLRS MNFNQFDPKSKLRRQSL LGRYRLDPSTGAPLNPMGR TGL  
LGKGLLPRWGP NHTV VVCITRWSRDARTGNQITRSNR SVLQYIALERNKRLCIPWYLT DHSNQCD F DVCV  
PKLISSFITRRARATLPERRVDRLLKLDKADVTQIFKGYLDDQLNADSAWTETV VINIHEGGTKGAYLN  
DTFLKIFSEPNAGEQARWMEVSQSSNLRTSHNYILKSVAENKNAFY



>Fig. TRPM<sub>p20</sub> (2134)

MTEQASIHRTSTVRRTVTRTGSVAPGDSVGSALATSAAALQHQASVRRASLMQRFVGEIEFTGLNQTAKF  
CKLDSNTNDQVIRDLLKRKWLKPPPTLIITVFGTDFEKKRKLKMIFFKGLWKAAESGCWIVTGGFHLGVM  
KLTGEAVRDYTDAYGGNRMMAFGVASWDCVTKNEILEAALHEGTAVYQSEEDDEERDESDRGVAGMRGDT  
AGDKTTRS DVEERALDPNHNFFILFDSGVSDQAKGKEAELRARFERCISLWSCATAALDQSVGGTAGLGG  
TAPLSAGITSSSQLQQQTQSGSNVNNQSSAVFQREGSTKISAAPQSSSGNLSSGSASKTQVAQGTFSST  
GIAAQRTTGEQLSASQGTGVRTSGEKSF PDLNKPQKSGKSVGSEEQVLVPMCGLVVGGDRFTLRQVYCSM  
IQNRCPIVVTKGTSGAADVIAFGLDAANKMATEEVVDDKEPVPLENRIESIIDEFSLDMHPDCTNYTEEV  
NMLCEIISEYSNLVS VFDMEEDSDLDGYVISSLLASAGSTVASDQINLEQLEITLTLNRADIAREKIFLE  
NKKWKKGQLNDYMYHALMSDRHDFVKLFLEQGFSL EEF LTVYMLEKLYTDQLKNLNSKVAIFNKMWEYNR  
SHRQSSKVALRDVGKVIKALVGDFYHPLYLSKEFQAKLVPDKQLEGAARNAIRRGATSGAAGPMDLEDE  
DKLRPETNGKANRVKGGAVRQESRDSDEFYPGRGMPRSSTTVTTVSGEVLLPAASPAKRVPVDEQVNSRR  
GKVTQSRTQSRLPPP YDTTAAASSTSYVRPNIHVATGRTGTSQYRS GTNTTHLRYARRRPSLENMYDIP  
GQPLVYNATVANVIRSGHESRGTHNTGRGYVRMTGRAPLAQDSVASADTSSVRVSLGQVRNDHFPGSLE  
RVPDHIATYTPRRGSEASHSTLALDNMGKPSRSCLSACWHWFTSNCGHIFRRSREKEGDKLRNVMQQAQ  
FHQQLQQQQGQGGQPGIKGPREFATLRAMAALAAAATAAVADPTKAAHGDEEQTKAIQLDRPARELLIW  
SILVGKLRMAELFWTMEKEPIAGALLASILLTSLGNKTD DFTDKEDFRSFG RN FQERAEGVLNECYREDE  
HRTQLIINHELTYGRSSVIKLA AEGQSIKFM AHPCQDFLTNTW SGNLSTKNSVIRYFFGIVCGLTIPF  
LIPKII LAKPKAQPINEEEETGGRAETILHNTDEPSPETSLLGWETTAKTSIRRGLHERAREYFQQIRDF  
YMAPVIRFVYTTVSYATFLVLFSYLLLVD FRIEISIVEYVVI AWVVTLFIEEIKQIAWAVLSGISFSTYI  
SDGWNKLD CAGLGLFILGFFLRLTVLLRMDKAEPLSPLHERYHVLTD PFLDVSRTC LAISLFVEYTRLMY  
TFSFHIALGPKLIMIGKMTNDLIPFMIILTVMIMLG YAVAAQSIAYPNGLFTKENMTLGS DIKHMNF GDI  
IFNMYTTSYFQMF GDFSLDALQGEDPKCQNHMCPTKTSRWLVPIMLGFYVLLTNI LMFNLLIAMFSKTYE  
EIESASTYYWNYQRYQMINDYVHR SPLV PPIIFWHFYEAYKAI GDRCASLRNHENIKHNPFCVRF TDVK  
KEREMVKWEHMKAMDYLREPSTKASGKRGVAESRAVVFRGGGAGPGQGPVMDLKSEMSSVTEGIGMELEK  
RFKEIDSQFQRFNDVDSRLTEVTQMLSNLSDVVR SVTETQQRIMKQISELPTCQCNELSDEVISAPSDEK  
GASSKEIRKRTKLEIAVQSALEAAKDVL RPPTPPPPPPPPPPPPRES PVL LAAPVPAGSEDDSSGSEEGG  
DPKADPF AVPEVTD SRTGRVIERVINAHRLWRIAPFNFEKYPGMRMNPPEKMAWTTEYPDYFAYDACEE  
VLLFPNEDAHDGENEKLRS MNFNQFDPKSKLRRQSLLGRYRLDPSTGAPLNPMGR TGLLGKGLLPRWGP  
HTVVVCITRWSRDARTGNQITRSNRSVLQYIALERNKRLCIPWYLT DHSNQCDFDVCVPKLISSFITRRA  
RATLPERRVDRLLKLDKADVTQIFKGYLDDQLNADSAWTETVVINIHEGGTKGAYLNDTFLKIFSEPN  
GEQARWMEVSQSSNLRTSHNYILKSVAENKNAFY

>Eg. TRPM<sub>p20</sub> (2103)

MTDSGGGGVGGSLLRQMSTIQHRQSRVGSSTVNESSASTAHSPHALLPSASIRRPSQVHRFHGEIEFTGL  
NQTARFAKLSSSMSDSAIRDLLQRRWSLKPPTLIITVFGTDFEKKRKLKMIFFKGLWKAADSGCWIVTGG  
FQLGIMKLAGAVRDYTDAYGGRMLAFGISSWGCVKKNDILEAALEEGTAVYQSEEDKDSDAEQSSTTE  
TATANATAASSTQKRTDVEELALDPNHNYFIFAETAKTDHTKGREAGMRARFERCISLWSTSTPEADPPP  
SAARLSQSGGVGKTTTISTAEPEEDYATTLKRKSTLRHQASEKTEGRSLSRSSSKFKSGGSGAGGDGSAG  
GGGNNASGEDIRIPMCGLVIGGDRFTLRQVYCSIMQNQCMPVVAKGTSGAADVIAFGLEAATKMETEEI  
LEDKEAISLETRLGSMVEQFLREMHPDYNFAEVSMMLAEIITDYVSLVLFVDFMEEDSDLDGYMISSLLA  
SAGTSTPPDQLNLEQLEITLTLNRADIAREKIFLENKRWKKGQLNDYMYQALMGRHDFVKIFLEQGFSL  
EEFLTVYMLERLYTDQLKNMSSKVAIFNKMWEYHRSHRASKVTLRDVGKVIKSLVGFYHPLYLSKEFQQ  
KLAPEKSDLAAVLPNKFSGKPPRTHHNNRNPGGGGGGVGATSTQDVPPhkfkAISICPNVLGLHEPVS  
FIDDFDEHPKVYKAASLLKQEKGEAENPNASASHLLFSFTKDNEVQSSPCFDTADSATPRGMQRSSTR  
TTTLSMEQKYTTGESIQMVSSGEAQSWAARQPD SIPSDGEYEVVEEVKVKRSRFAVTHIGLDKIQYGRYQ  
KRRISFEKMKEQVASGRGQYYGNPAFLARQHAFQSSVTAPLAVDEKYSRPSRMLRENSVESTYESQH  
TQQQSMSEDEDEDEEAVGFGGNLKRRIEALRRRTSKDHEGGAHLEGLAPGNLQTLRAVAALAAVA  
GGMGGGSTDPEKTAANEERIKLIQFDRPARELLIWSVLVGLKLRMSELFWTMEKEPIAALLASILLSAL  
SNKTD DFTDKEDYKNYSKSFQEKAEGLNECYREDEHRAQLIINHELAYYGHSSVIKLAEEGQSIFMAH  
PCCQDFLTNTWKGNLSSKNMFRMMFGLMFGLTmplfIPKVLlyEPEDKQSEAGEESNDSTEQKDEELSE  
DVESRVMVKRSLTTSLQVGAMEFWVKIKDFYMSPIVRFVYHTISYVLFVLFVLSYLLLVDKVRITGVEYI  
VLAWVITLFIIEIKQIAWSVLSGISFSSTYISDGWNKLDCTGLILYIVGFILRLIVLARLGDSQLNHDTEA  
FHILTDPIMDPSRICMAFSLFVFIYIRLMSFSFHIALGPKLIMIGKMTNDLIPFMIILTVMVGYAVAA  
QSIAYPNGFYTSEQLSINGTVQGMKFIDTIFSMYTTAYFQMFQDFSLDTLQGEDRNCQNGMCPTKTSRWL  
VPIMLGFYVLLTNI LMFNLLIAMFSKTYEEIESASTYYWNYQRYQMIADYVRRSPLVPPLIIFWHFYEAY  
KALGNRCASIRSTEQIENNPFCVTFKDEKQKREMVKWEHMKAMDYLREPSTKSGGKRGGVESRAVVFRGV  
GAGSGMGPVMDLKSEMTAVTEGIGMELEKRFKDLDAHFQRFNEVDARL TEVTQTLSLGEVVRQVTAT  
QEAIMKKIADLPTCQCIELVDEPESADGKDKSGESPKRRTKLEVAVQSALEAAKDVL RPPTPPPPPPMAP  
PPPRDQEIPITTGAPGSEAESSGTEDSGGDPSADPVQIPPAVDSNAGRTLQORNIAGHRLWRFPFNFEKY  
PGMRMNVPPDKTAWTTRYPDYFAYDSSEETVLYPDETAHDGENFQHGVSFGSSAILRSIPFNTYDSKNHI  
RRQSL LGRYRLDPNTGAPLNPMGR TGLLGKGLLPHWGPNSIVIVVTQWSRNPKSGTPVLRGNKGV LQVI  
ALERNKRFLPWF FTDHESRCDYDECVP TVVRA YFAQRARAVCSEK RADRLLRRLDKADVTQIFKGYLDD  
QLNADGGWLETVVLNFHEGEGRGAQFTDDILKVFAESVADERVRWIEVAHNSNLRTSHNYILKSVAEIKG  
AFY

>Mc. TRPM<sub>p20</sub> (2126)

MTDGGGVGGSLLRQVSTIRHRQSRIGSMVGESTASTVHSPHALQTGASMRRASQIHRVHGEIEFTGLNQT  
ARFAKLSPYMTDSAIRDLLQRRWGLKPPTLIITVFGTDFEKKRKLKMIFFKGLWKAADSGCWIVTGGFQL  
GIMKLAGEAVRDYTDAYGGNRMLAFGISSWGCVKKNDILEAALEEGTAVYQSEEDKSDAEQSSTTETAT  
ANATTASSLKRTDVEELALDPNHNYFIFADTAKTDHTKGREAEVRARFERCISLWSTSTPETEPPLSANR  
PSQSGGVRSTSVTAAEPLDYATTLKRKSTIKRQTSEKTERRPLSRSSSKFKGSSGGGAGGGGGGGGGA  
DGSGEDVRIPMCGLVIGGDRFTLRQVYCSIMQNQCMPVVAKGTSGAADVIAFGLEAATKMETEEILEDKE  
AISLETRLTSVMEQFLREHMPDYNFAAEEVSMLLEIITDYVSLVLFVDMEEADLDGYMISSLLASAGTS  
TPPDQLNLEQLEITLTLNRADIAREKIFLENKRWKKGQLNDYMYQALMGDRHDFVKIFLEQGFSLLEFLT  
VYMLERLYTDQLKNMSSKVAIFNKMWEYHRSHRQASKVTLRDVGVKVIKSLVGDYFHYPLYLSKEFQQKLAP  
EKPDLA AVLPMKFHKPQNHNRPDGGGGGGGGVVNSRNHREGGCYRDGDLTKTST SAYDAANRFKSIT  
ICPNVLGLHEPVSFIDYIDEHPKVYKAAPALKQDSKSVENYQGLLRETSPSQLLFTPPKDDEVGDERTP  
TLDTGDNVSPADIKRSSTKTTTTLSLEQKTVLGEATPMIGSGDTQSWAERQACRQDSVPSEGEYEVEETKS  
KKS RFSVTHIGFDKVR YGRHQKRRLSFEKMKAIQVASGRGQHYGNPNFIGRQHVVLPHTTAAAPLAVHEQ  
SSRPAPLMFRESSIESTYESQHAQQQSI SGEEDDEDDEEDDEEEVGLGGHLKRRLIEVLRRTAKENES  
GHFEGLLPGNLQTLKAVAALAAVAGGMGGGGPTDPDKTAANEEARIKLIQFDRPARELLIWSVLVGLR  
MSELFWTMEKEPIAAAALLSILLSALSNTDDFTDKEDYKNYSKSFQEKAEGLNECYREDEHRAQLIIN  
HELAYYGHSSVIKLA AEGQSIKFM AHPCQDFLTNTWKGNLSSKNSMFRMMFGLIFGLTMPLFIPKVLLY  
ETEEKQNENGESNDSTEQKDEDLSEDIERSVAVKRSLTTSIQVGAMEFWTKIKDFYMSPIVRFVYHTISY  
VLELVIFSYLLLVDFKVKITGVEYIVLAWVITLFI EIKQIAWSVLSGISFSTYISDGNWKNLDC TGLILY  
IIGFTLRLIVLARLGDSQMNNDTEAFHILTDPI MDPSRICMAFSLFV FYIRLMYSFSFHIALGPKLIMIG  
KMVTNDLIPFMIILTVIMVGYAVAAQSIAYPNGFYTSEELTINGTVQGMKFIDTIFSMYTTAYFQMF GDF  
SLDTLQGEDRNCQNGMCPTKTSRWLVPIMLGFYVLLTNILMFNLLIAMFSKTYEEIESASTYYWNYQRYQ  
MIADYVRRSPLVPLIIFWHFYEAYQAIGNRCASIRSTEQIENNPFCVTFKDVKKEREMVKWEHMKAMDY  
LREPSTKSGGKRGGVESRAVVFRGVGAGSGIGPGPAMDLKSEMTAVTEGIGMELEKRFKDLDAHFQRFNE  
VDSRLNEVTQTLSTLGDVVKQVTATQEAIMKKIADLPTCQCLELVDDASSSPGKAGEASKKRTKLEVAVQ  
SALEAAKDVLRPPTPPPPPPMAPP PPREQDIPITAGAPGSEGESSGTEEVGGDPSADPVQVPPAADVNTG  
RTIQRSIAGHRLWRFAPFNFEKYPGMRMNVPDKTAWTTRYPDYFAYDSSEETVMYPDEAAHDGENFQHG  
VSFGSSAILRGIPFNTYDSKNHIRRQSLLG RYRLDPNTGAPLNPMGR TGLLGKGLLPRWGPNH SIVIVVT  
RWSRNPKSGTPVLRGNKGVLVVALERNKRFLPWFFTDHEMRCDFDECVPALVHAFFVQRAKAVCSEKR  
GDRLLRRLDKADTTQIFKGYLDDQLNADGGWLETVV LNYHEGEGKGSQLTDDILKVFSEGVAEENVKWIE  
VAHNSNLRTSHNYILKSVAEIKGAFY

>M1 . TRPM<sub>p20</sub> (2143)

MMEQAGSAIDSWLDAAYAGDLSRLRDLHQSGLVQLESRADFDKAEMKSVTALLLAAAADRYHCTRWLLSE  
GADRKAALPDGRTALHLACQFGCPLVTAALLEAGCDVDATDSAGRQPLQLAASPECILLLLKAGASIQPA  
HASHQEKSKESSLGQNSGLLDRFKNDREHSWYPLNLSRRQCVQFSPSRSDPVVCACGGTAEGHPSDMLP  
SDNDSGGFGGSIRRKFSLKPQQQQQQQQKQDVPANELDYLAELPTNAFGEIEFSGMKQLAKFVRLDS  
NTPEEALHELLVKKWEMSRPTLVINIFGGDFEKKRQLKMI FKKGLWKAESAGCWI VTGGFNVGIMKLTG  
EAVRDYTDAYGSNHMNAIGIASWGC IARREALENHNYEGSFPASYQSEDS DSGRPQDLQPASIAQDEEEL  
PLDPNHTHFFLVDTGFNRRKGRDCQFRTRFAHVIGTWRDEENREVKVPMCGLLIGGDRFNLEQIF YALTD  
NRCP IMAIKGTGGAADVAVAFDSYFQEVASPDNPKKELETDEEKQARLSAKLAGICQEFFNSPEGFCDY  
SREVEMLHT IMAQHTSLIEIFDMEEDFDLDGKMIASLLSSAGSDTNPDQLNLKQLKICLTLNRADIARDK  
IFLENKKWKKGNLNEFMYQALMEDRHDFVKLFLEQGF SLEDFTVYI LEKLYTDQLKRLNSKVAIFLQLW  
EYYRSHRSSKQVKLREVGKVIKVLVGDYFYQPLYTKKDFEGNLANPAVSGKQKPGHFPLPGHRKDKSGNGS  
GSFLQQPQQSEHRQSLQQQQQQQPQH PGPSPGLEEMAICDYERSPVNFSGKD HARKRDLAIANKISSDS  
NVTAFSGIMFMDEEDQSFDTKGMGFANPMLDLAGVES PSSVADFN GASRDGSSGTKKVKS NFFRLKRRRS  
SLEFMEAVRAPASGSSGHSGKGANSQQMGSKQHLRQQELSGAAAKATKEEESKLKTINLERPARELLIWS  
LLVGKLQMAELFWTMEKEPVAAALLSSMILKAMVGR TDDFTDKEDFQRGGAQFEDHAWGVLDQCYREDER  
RALLLINRELKPHYGDSSCIYLAAGESIKFMAHPCCQDFLTSTW MGRLSAKNSMTRFSIGILCGIVCPWL  
VPSVMLYKLT DREIERQVAEQQQQKTPSLTARSEDAAADPESGGPTYEGGDRKSLLSHIRQASV LNCGQT  
CQRMKEFYMAPVVRVYNTFSYLTFLMFSYLLLFDLKHDF TVMEYIVISWIVTLLLEEVKQATLSGISF  
STYISDSWNKLDCTAVGLFVLGLVLR LISLLSEPETVLLSGHAYDVILT DGLFVAARICYAFSLFAFCI  
RLMYIFSFHIALGPKLIMIGKMVINDLV PFMVILLV FIFILGYGVA AQSIAYPTGFYTPNQDFNKTSPKKMT  
HTEIFIHFLTRAYFQMFQDFGLDS IQAEDSGCLDEGKCPHWTAKWLLPIMLG VYVLLTNILMFNLLIAMF  
SSTYESINQFSALHWNYQRYSMIKEYIERSPLAPPLIFWHAYELVFFIQLRYQGRK LSELEDPLRISYK  
DNVKKERELVKWEHMKAMDFLRQDQECHGKKGGRSDSKSVIVRTSGPQLGAGGLLPAAADVAKQMSDATS  
GIGMELEKKFKSVDTQLTKISTDFDQRLTDL SNTLNGFSVAVQALREGQERLASVQQARAVAGSVNTAEA  
QQQQLNQLEQRVLEAVTTAYQSAPPWFQEIARTAAAEALASTPV SVGQLDQEV LQQLASASSSSGTAER  
RWRRRGAAPASSAGADPTSGSAAVEGGGLQGSSLTSAASKAAGATTAGVAEPRGAAAATAATGATAAEEG  
DDEEDDFDDNEDLEEDAATIRPVVDDPGTGRLIEYRSLQHRLWRYV PPFNFEQYPGMRMNVPPDKIPWEID  
YRDYFAFDASEEVLIFPNEESFDGPTVPLQS INFNQLDSRSLRRQSMMG RYRLDTVSSAPLNPMGRTGL  
KGKGLLPRWGPNNNAVVIAMTRWSRAPSGAVIHR LGHPILQVLSLFRHKQFCLPWFLTDHFDNCDYDDCV P  
ALLKNFISRRLKQLLQKKDARQEINAIMKGRAEQIFKGYMDDHLNADNAWIEAVVINVHESDNWKFS DAM  
LKV FSEVDSDEQARWMEVAYSTAMRSSHC EMLKTIASNH RAYF

Supplementary Figure 2

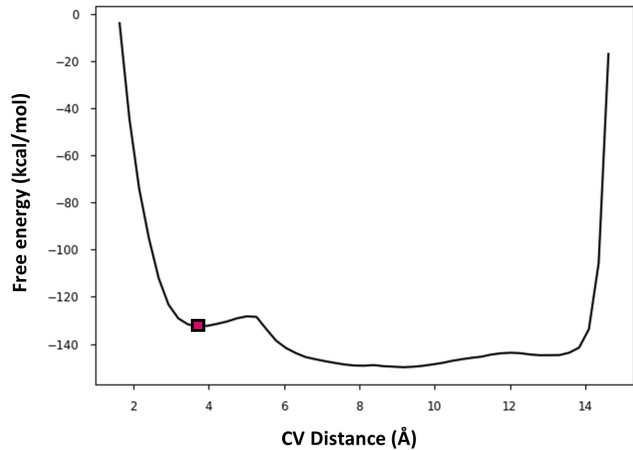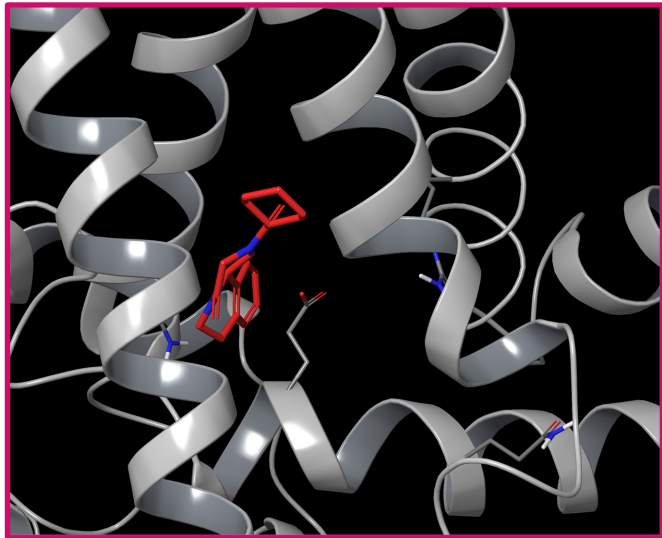

**A**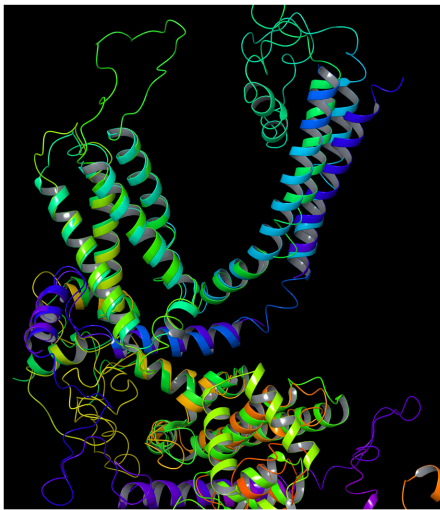**B**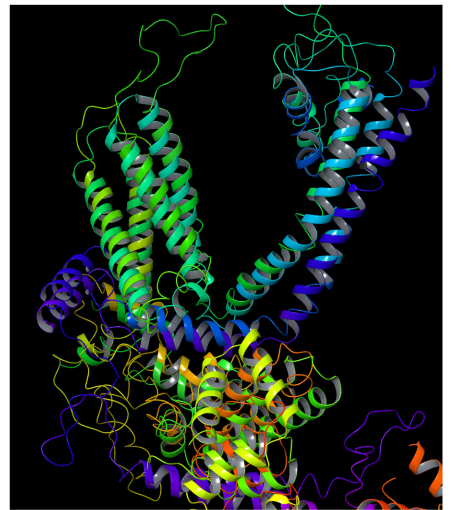**C**

*Sm*.TRPM<sub>PZQ</sub> overlaid with *Hs*.TRPM8 (PDB 6NR3)

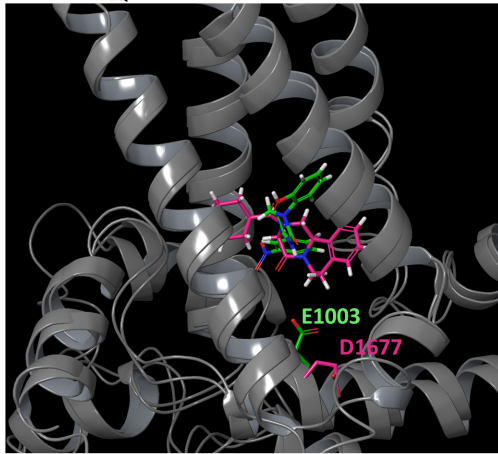*(R)*-PZQ

icilin

**D**

*Sm*.TRPM[D1677E]<sub>PZQ</sub> overlaid with *Hs*.TRPM8 (PDB 8E4L)

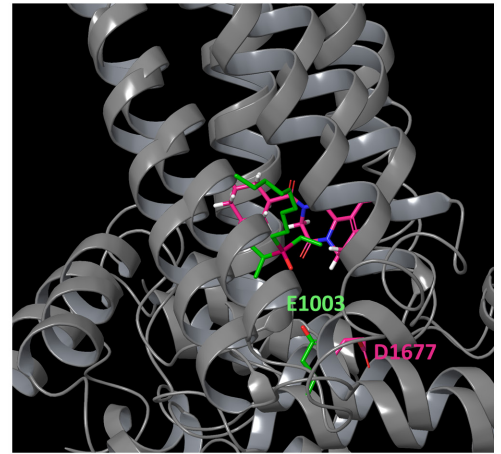*(R)*-PZQ

Cryosim-3

**E**

*Sm*.TRPM<sub>PZQ</sub> overlaid with *Hs*.TRPM8 (PDB 6NR3)

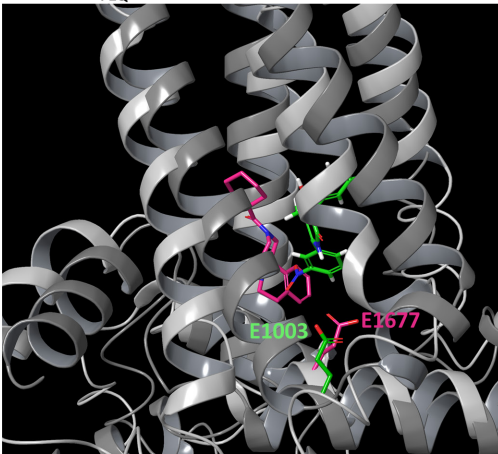*(R)*-PZQ

icilin

**F**

*Sm*.TRPM[D1677E]<sub>PZQ</sub> overlaid with *Hs*.TRPM8 (PDB 8E4L)

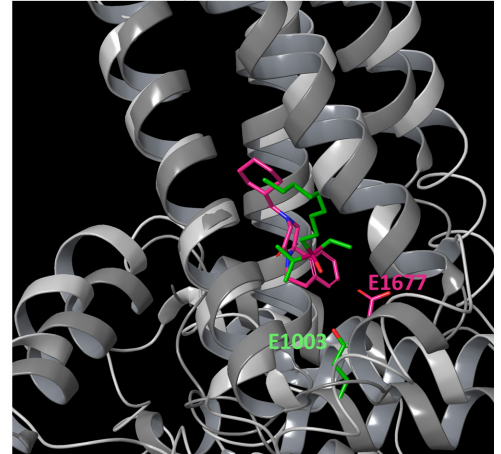*(R)*-PZQ

Cryosim-3

**Supplementary Table 1**

|           | <b>Sm</b> | <b>Sh</b> | <b>Sj</b> | <b>Cs</b> | <b>Ov</b> | <b>Ec</b> | <b>Fh</b> | <b>Fg</b> | <b>Eg</b> | <b>Mc</b> | <b>ML</b> |
|-----------|-----------|-----------|-----------|-----------|-----------|-----------|-----------|-----------|-----------|-----------|-----------|
| <b>Sm</b> |           | 87.1      | 82.8      | 67.3      | 67.3      | 66.9      | 64.7      | 64.3      | 52.9      | 53.1      | 34.3      |
| <b>Sh</b> | 87.1      |           | 88.0      | 66.7      | 66.6      | 66.0      | 67.8      | 67.2      | 53.5      | 53.2      | 34.4      |
| <b>Sj</b> | 82.8      | 88.0      |           | 67.6      | 67.6      | 66.6      | 68.6      | 67.9      | 53.9      | 53.6      | 34.8      |
| <b>Cs</b> | 67.3      | 66.7      | 67.6      |           | 97.9      | 74.9      | 72.8      | 72.0      | 55.8      | 56.0      | 34.7      |
| <b>Ov</b> | 67.3      | 66.6      | 67.6      | 97.9      |           | 74.6      | 72.6      | 71.9      | 55.9      | 54.7      | 34.7      |
| <b>Ec</b> | 66.9      | 66.0      | 66.6      | 74.9      | 74.6      |           | 84.1      | 83.1      | 54.8      | 54.5      | 34.7      |
| <b>Fh</b> | 64.7      | 67.8      | 68.6      | 72.8      | 72.6      | 84.1      |           | 98.0      | 54.8      | 54.7      | 35.3      |
| <b>Fg</b> | 64.3      | 67.2      | 67.9      | 72.0      | 71.9      | 83.1      | 98.0      |           | 54.5      | 54.5      | 35.6      |
| <b>Eg</b> | 52.9      | 53.5      | 53.9      | 55.8      | 55.9      | 54.8      | 54.8      | 54.5      |           | 85.8      | 34.9      |
| <b>Mc</b> | 53.1      | 53.2      | 53.6      | 56.0      | 54.7      | 54.5      | 54.7      | 53.0      | 85.8      |           | 34.9      |
| <b>ML</b> | 34.3      | 34.4      | 34.8      | 34.7      | 34.7      | 34.7      | 35.3      | 35.6      | 34.9      | 34.9      |           |



Supplementary Table 2

| Class               | Order              | Family             | Genus & Species                | TM1             | TM2             | TM3       | TM4             | TRP                         |
|---------------------|--------------------|--------------------|--------------------------------|-----------------|-----------------|-----------|-----------------|-----------------------------|
| TREMATODA           | Strigeiida         | Schistosomatidae   | Schistosoma mansoni            | N T x S Y x x F | W x x T L x x E | W N x L D | F x x R L x Y T | D Y x x R x x x x P x x I   |
| TREMATODA           | Strigeiida         | Schistosomatidae   | Schistosoma haematobium        | N T x S Y x x F | W x x T L x x E | W N x L D | F x x R L x Y T | D Y x x R x x x x P x x I   |
| TREMATODA           | Strigeiida         | Schistosomatidae   | Schistosoma japonicum          | N T x S Y x x F | W x x T L x x E | W N x L D | F x x R L x Y T | D Y x x R x x x x P x x I   |
| TREMATODA           | Strigeiida         | Schistosomatidae   | Schistosoma bovis              | N T x S Y x x F | W x x T L x x E | W N x L D | F x x R L x Y T | D Y x x R x x x x P x x I   |
| TREMATODA           | Strigeiida         | Schistosomatidae   | Schistosoma curassoni          | N T x S Y x x F | W x x T L x x E | W N x L D | F x x R L x Y T | D Y x x R x x x x P x x I   |
| TREMATODA           | Strigeiida         | Schistosomatidae   | Schistosoma margrebowiei       | N T x S Y x x F | W x x T L x x E | W N x L D | F x x R L x Y T | D Y x x R x x x x P x x I   |
| TREMATODA           | Strigeiida         | Schistosomatidae   | Schistosoma mattheei           | N T x S Y x x F | W x x T L x x E | W N x L D | F x x R L x Y T | D Y x x R x x x x P x x I   |
| TREMATODA           | Strigeiida         | Schistosomatidae   | Schistosoma rodhaini           | N T x S Y x x F | W x x T L x x E | W N x L D | F x x R L x Y T | D Y x x R x x x x P x x I   |
| TREMATODA           | Strigeiida         | Schistosomatidae   | Trichobilharzia regenti        | N T x S Y x x F | W x x T L x x E | W N x L D | F x x R L x Y T | D Y x x R x x x x P x x I   |
| TREMATODA           | Opisthorchiida     | Opisthorchiidae    | Clonorchis sinensis            | N T x S Y x x F | W x x T L x x E | W N x L D | F x x R L x Y T | D Y x x R x x x x P x x I   |
| TREMATODA           | Opisthorchiida     | Opisthorchiidae    | Opisthorchis felinus           | N T x S Y x x F | W x x T L x x E | W N x L D | F x x R L x Y T | D Y x x R x x x x P x x I   |
| TREMATODA           | Opisthorchiida     | Opisthorchiidae    | Opisthorchis viverrini         | N T x S Y x x F | W x x T L x x E | W N x L D | F x x R L x Y T | D Y x x R x x x x P x x I   |
| TREMATODA           | Plagiorchiida      | Troglorematidae    | Paragonimus westermani         | N T x S Y x x F | W x x T L x x E | W N x L D | F x x R L x Y T | D Y x x R x x x x P x x I   |
| TREMATODA           | Plagiorchiida      | Troglorematidae    | Paragonimus heterotremus       | N T x S Y x x F | W x x T L x x E | W N x L D | F x x R L x Y T | D Y x x R x x x x P x x I   |
| TREMATODA           | Plagiorchiida      | Troglorematidae    | Paragonimus kellicotti         | N T x S Y x x F | W x x T L x x E | W N x L D | F x x R L x Y T | D Y x x R x x x x P x x I   |
| TREMATODA           | Plagiorchiida      | Troglorematidae    | Paragonimus miyazakii          | N T x S Y x x F | W x x T L x x E | W N x L D | F x x R L x Y T | D Y x x R x x x x P x x I   |
| TREMATODA           | Plagiorchiida      | Dicrocoeliidae     | Dicrocoelium dendriticum       | N T x S Y x x F | W x x T L x x E | W N x L D | F x x R L x Y T | D Y x x R x x x x P x x I   |
| TREMATODA           | Plagiorchiida      | Microphallidae     | Atriophallophorus winterbourni | N T x S Y x x F | W x x T L x x E | W N x L D | F x x R L x Y T | D Y x x R x x x x P x x I   |
| TREMATODA           | Plagiorchiida      | Echinostomatidae   | Echinostoma caproni            | N T x S Y x x F | W x x T L x x E | W N x L D | F x x R L x Y T | D Y x x R x x x x P x x I   |
| TREMATODA           | Plagiorchiida      | Fasciolidae        | Fasciola gigantica             | T T x S Y x x F | W x x T L x x E | W N x L D | F x x R L x Y T | D Y x x R x x x x P x x I   |
| TREMATODA           | Plagiorchiida      | Fasciolidae        | Fasciola hepatica              | T T x S Y x x F | W x x T L x x E | W N x L D | F x x R L x Y T | D Y x x R x x x x P x x I   |
| TREMATODA           | Plagiorchiida      | Fasciolidae        | Fasciolopsis buski             | N T x S Y x x F | W x x T L x x E | W N x L D | F x x R L x Y T | D Y x x R x x x x P x x I   |
| MONOGENEA           | Monopisthocotylea  | Gyrodactylidae     | Gyrodactylus salaris           | H T x S Y x x F | W x x T L x x E | W N x L D | F x x R L x Y T | E Y x x R x x x x P x x I   |
| MONOGENEA           | Monopisthocotylea  | Gyrodactylidae     | Gyrodactylus bullartarudis     | H T x S Y x x F | W x x T L x x E | W N x L D | F x x R L x Y T | E Y x x R x x x x P x x I   |
| MONOGENEA           | Polyopisthocotylea | Polystomatidae     | Protopolystoma xenopodis       | N T x S Y x x F | W x x T L x x E | W N x L D | F x x R L x Y T | E Y x x R x x x x P x x I   |
| CESTODA             | Cyclophyllidea     | Taeniidae          | Echinococcus canadensis        | H T x S Y x x F | W x x T L x x E | W N x L D | F x x R L x Y T | S D Y x x R x x x x P x x I |
| CESTODA             | Cyclophyllidea     | Taeniidae          | Echinococcus granulosus        | H T x S Y x x F | W x x T L x x E | W N x L D | F x x R L x Y T | S D Y x x R x x x x P x x I |
| CESTODA             | Cyclophyllidea     | Taeniidae          | Echinococcus multilocularis    | H T x S Y x x F | W x x T L x x E | W N x L D | F x x R L x Y T | S D Y x x R x x x x P x x I |
| CESTODA             | Cyclophyllidea     | Taeniidae          | Echinococcus oligarthrus       | H T x S Y x x F | W x x T L x x E | W N x L D | F x x R L x Y T | S D Y x x R x x x x P x x I |
| CESTODA             | Cyclophyllidea     | Taeniidae          | Hydatigera taeniaeformis       | H T x S Y x x F | W x x T L x x E | W N x L D | F x x R L x Y T | S D Y x x R x x x x P x x I |
| CESTODA             | Cyclophyllidea     | Taeniidae          | Taenia asiatica                | H T x S Y x x F | W x x T L x x E | W N x L D | F x x R L x Y T | S D Y x x R x x x x P x x I |
| CESTODA             | Cyclophyllidea     | Taeniidae          | Taenia multiceps               | H T x S Y x x F | W x x T L x x E | W N x L D | F x x R L x Y T | S D Y x x R x x x x P x x I |
| CESTODA             | Cyclophyllidea     | Taeniidae          | Taenia saginata                | H T x S Y x x F | W x x T L x x E | W N x L D | F x x R L x Y T | S D Y x x R x x x x P x x I |
| CESTODA             | Cyclophyllidea     | Taeniidae          | Taenia solium                  | H T x S Y x x F | W x x T L x x E | W N x L D | F x x R L x Y T | S D Y x x R x x x x P x x I |
| CESTODA             | Cyclophyllidea     | Hymenolepididae    | Hymenolepis diminuta           | H T x S Y x x F | W x x T L x x E | W N x L D | F x x R L x Y T | S D Y x x R x x x x P x x I |
| CESTODA             | Cyclophyllidea     | Hymenolepididae    | Hymenolepis microstoma         | H T x S Y x x F | W x x T L x x E | W N x L D | F x x R L x Y T | S D Y x x R x x x x P x x I |
| CESTODA             | Cyclophyllidea     | Hymenolepididae    | Rodentolepis nana              | H T x S Y x x F | W x x T L x x E | W N x L D | F x x R L x Y T | S D Y x x R x x x x P x x I |
| CESTODA             | Cyclophyllidea     | Mesocestoididae    | Mesocestoides corti            | H T x S Y x x F | W x x T L x x E | W N x L D | F x x R L x Y T | S D Y x x R x x x x P x x I |
| CESTODA             | Cyclophyllidea     | Anoplocephalidae   | Moniezia expansa               | H T x S Y x x F | W x x T L x x E | W N x L D | F x x R L x Y T | S D Y x x R x x x x P x x I |
| CESTODA             | Diphyllobothriidea | Diphyllobothriidae | Schistocephalus solidus        | H T x S Y x x F | W x x T L x x E | W N x L D | F x x R L x Y T | E Y x x R x x x x P x x I   |
| CESTODA             | Diphyllobothriidea | Diphyllobothriidae | Spirometra erinaceieuropaei    | H T x S Y x x F | W x x T L x x E | W N x L D | F x x R L x Y T | E Y x x R x x x x P x x I   |
| CESTODA             | Diphyllobothriidea | Diphyllobothriidae | Dibothriocephalus latus        | H T x S Y x x F | W x x T L x x E | W N x L D | F x x R L x Y T | E Y x x R x x x x P x x I   |
| CESTODA             | Diphyllobothriidea | Diphyllobothriidae | Sparganum proliferum           | H T x S Y x x F | W x x T L x x E | W N x L D | F x x R L x Y T | E Y x x R x x x x P x x I   |
| RHABDITOPHORA       | Macrostomida       | Macrostomidae      | Macrostomum lignano            | N T x S Y x x F | W x x T L x x E | W N x L D | F x x R L x Y T | I E Y x x R x x x x P x x I |
| RHABDITOPHORA       | Dugesidae          | Dugesidae          | Schmidtea mediterranea         | N S x S Y x x F | W x x T L x x E | W N x L D | F x x R V x Y T | I F F x x R x x x x P x x I |
| RHABDITOPHORA       | Tricladida         | Dugesidae          | Dugesia japonica               | N A x S Y x x F | W x x T L x x E | W N x L D | F x x R V x Y T | I E F x x R x x x x P x x I |
| Homo sapiens: TRPM2 |                    |                    |                                | N I x S Y x x F | W x x S L x x E | W N x L D | F x x R L x H I | I E Y x x R x x x x P x x I |
| Homo sapiens: TRPM8 |                    |                    |                                | N V x F Y x x F | F x x V L x x D | W N x M D | F x x R L x H I | I E Y x x R x x x x P x x I |
